# Supplementary material for: Synergetic effect of ruthenium and basicity sites in the Ru–MgAl catalyst for hydrogen-free production of conjugated linoleic acids
Source: Royal Society of Chemistry journal article supplement (doi:10.1039/c5ra00417a), 2015-01-01
Supplement: c5ra00417a1.pdf [file c5ra00417a1.pdf]

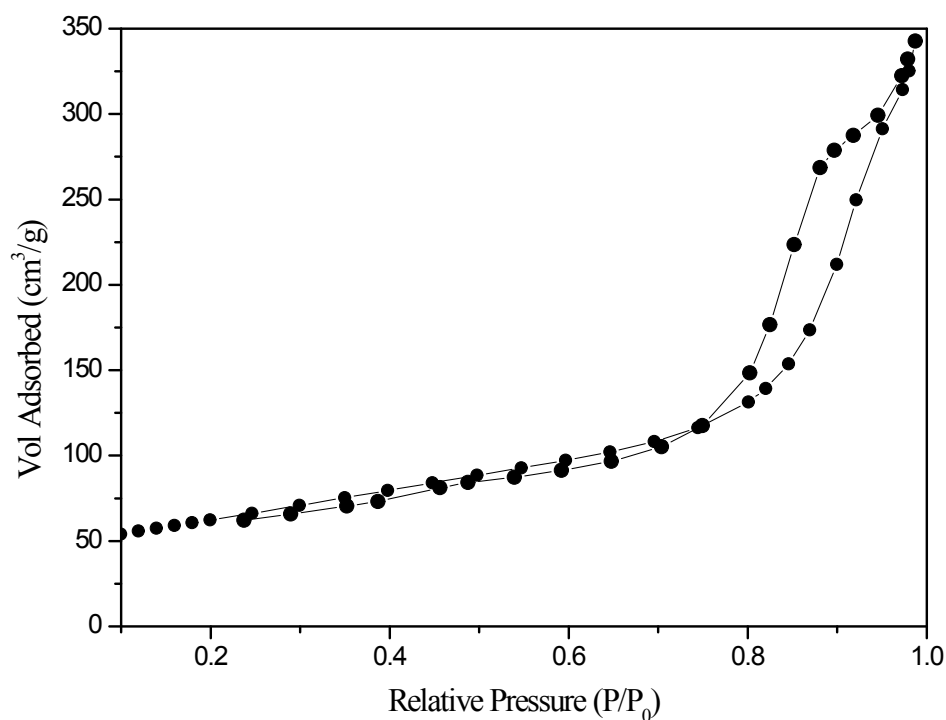

Fig.S1. Nitrogen adsorption-desorption isotherms of Ru-MgAl350.

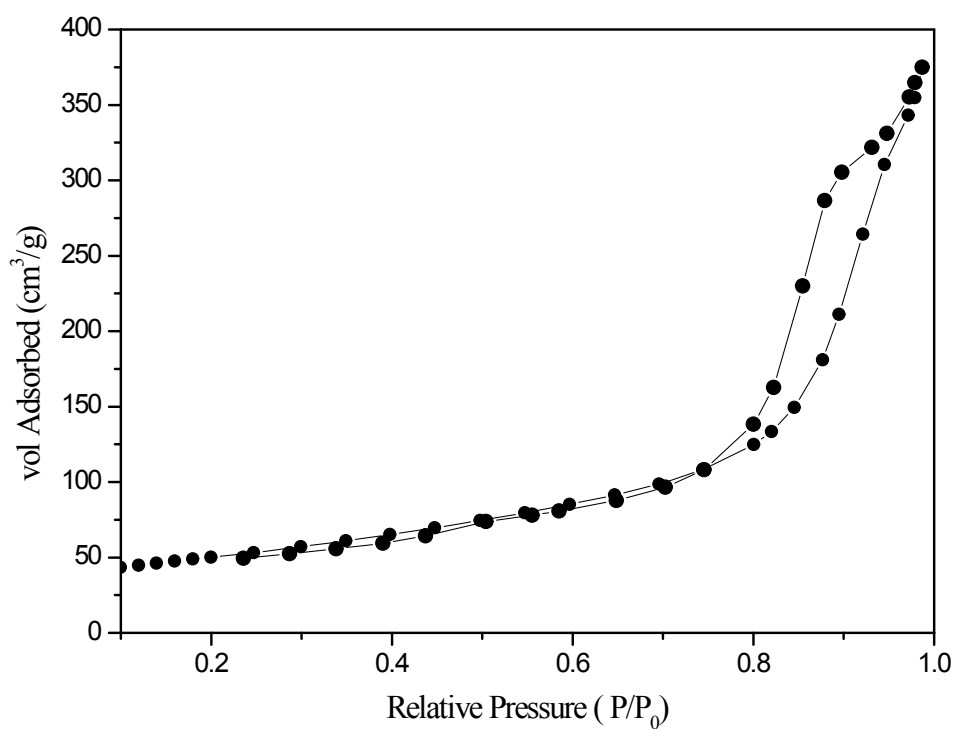

Fig.S2. Nitrogen adsorption-desorption isotherms of Ru-MgAl400.

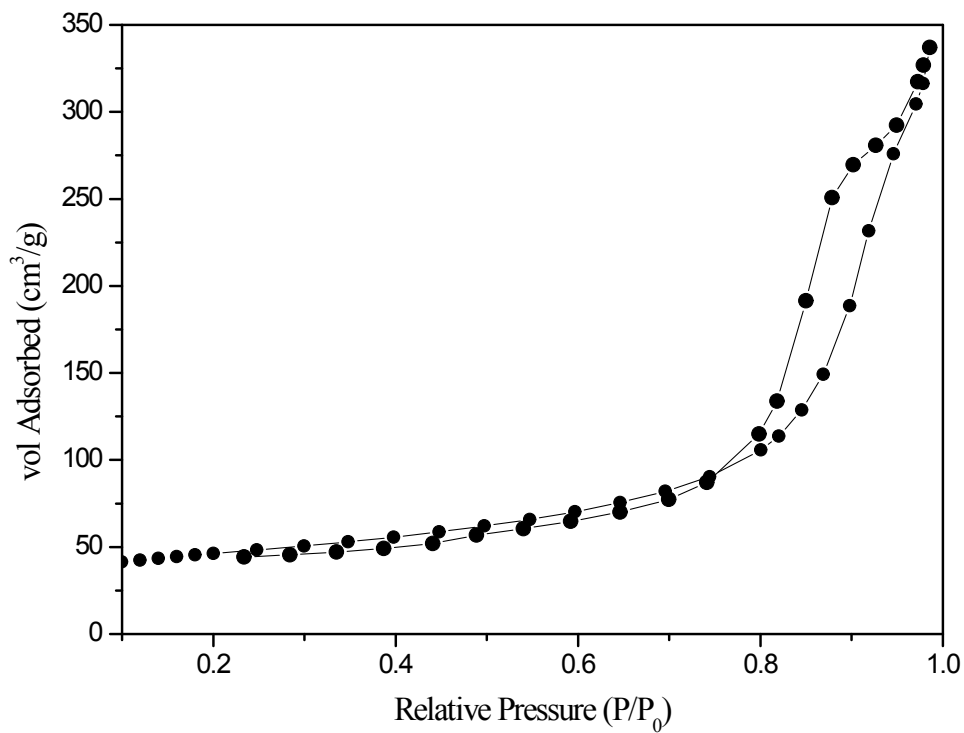

Fig.S3. Nitrogen adsorption-desorption isotherms of Ru-MgAl450.

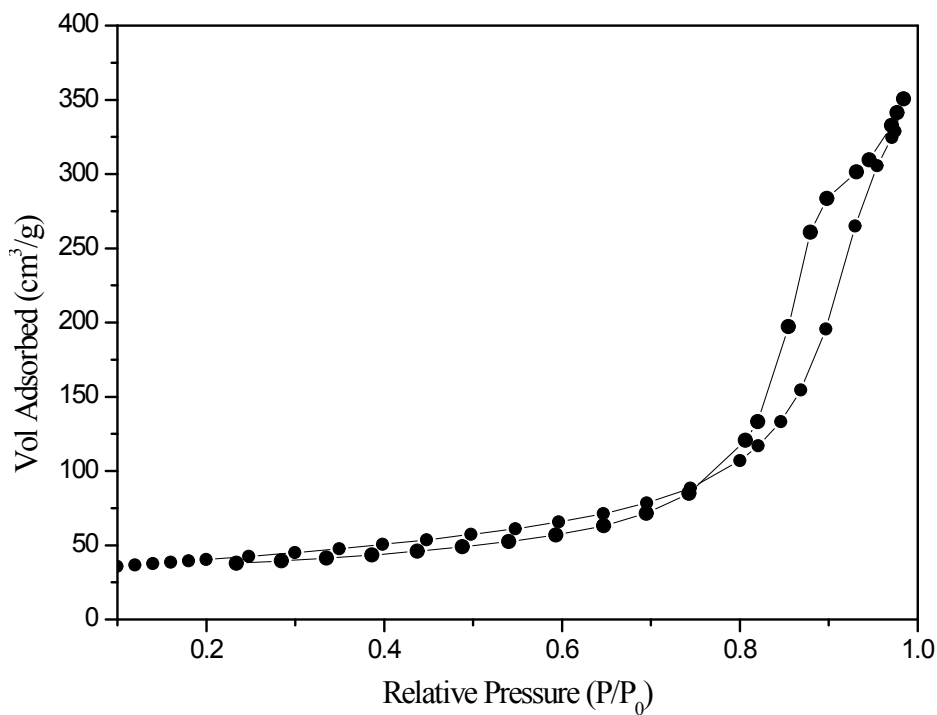

Fig.S4. Nitrogen adsorption-desorption isotherms of Ru-MgAl550.

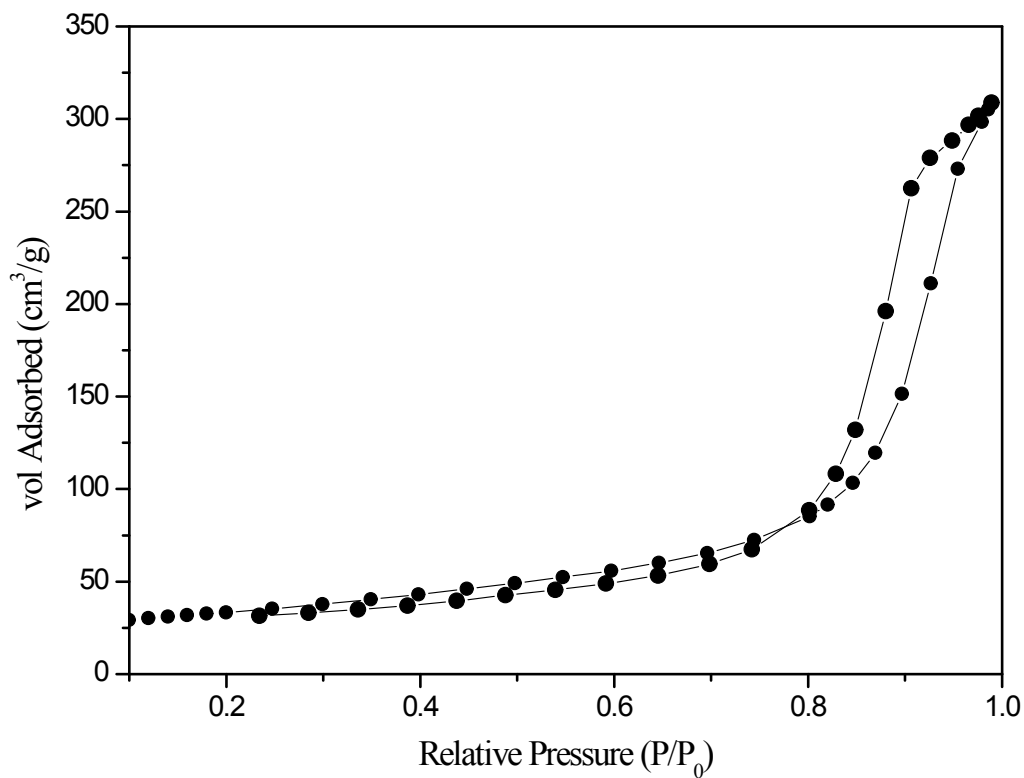

Fig.S5. Nitrogen adsorption-desorption isotherms of Ru-MgAl1700.

Table. S1. The content of the Ru-MgAl450 components detected by XRF

| Catalyst   | Mg, wt% | Al, wt% | Ru, wt% |
|------------|---------|---------|---------|
| Ru-MgAl450 | 77.6%   | 21.6%   | 0.8%    |

06\藿香正气水0000009.D)

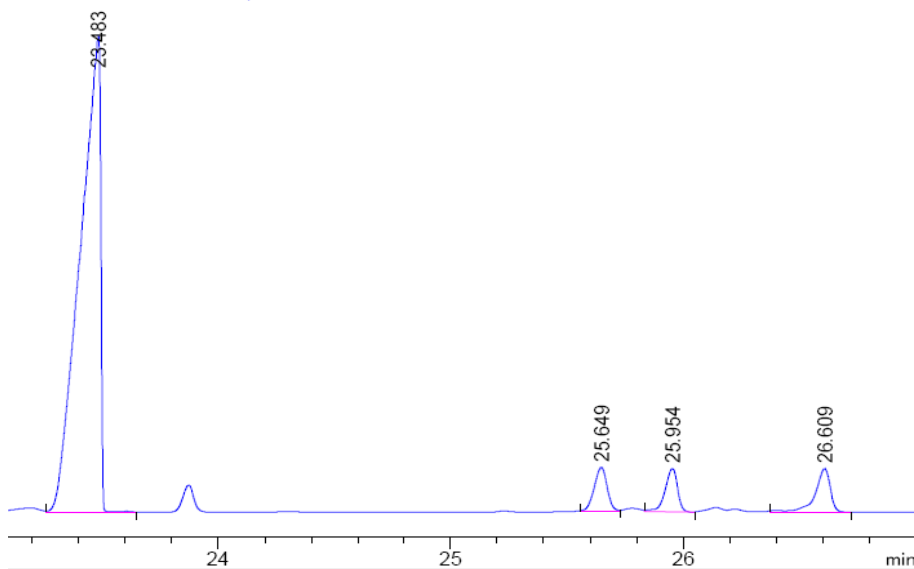

Fig.S6. Gas chromatogram of the isomerization products from linoleic acid using Ru-MgAl300 catalyst.

11-12-06\藿香正气水0000010.D)

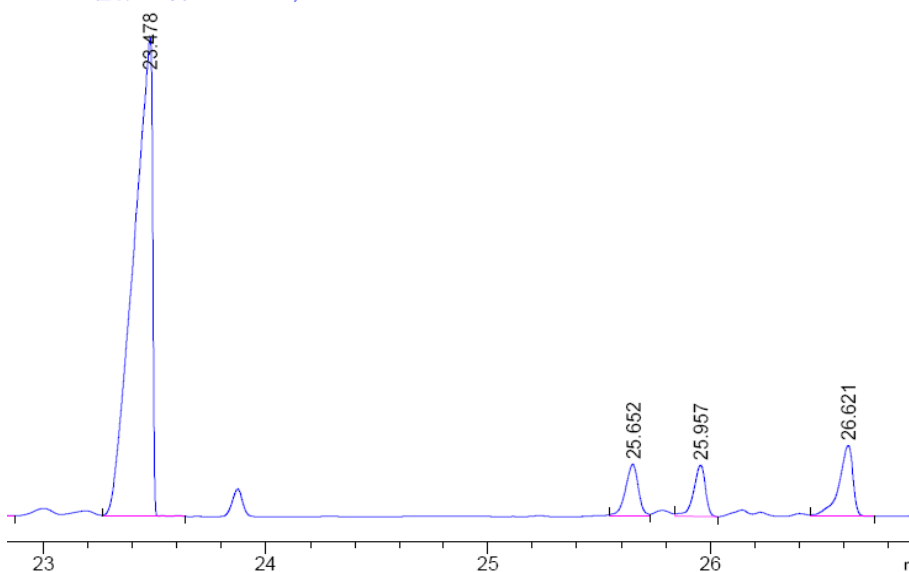

Fig.S7. Gas chromatogram of the isomerization products from linoleic acid using Ru-MgAl350 catalyst.

18-58-50\108F0801.D)

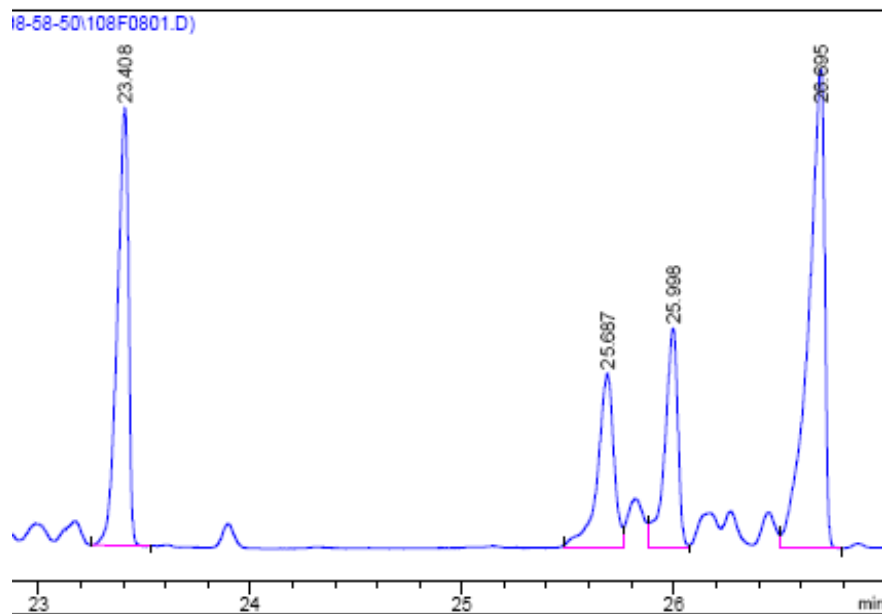

Fig.S8. Gas chromatogram of the isomerization products from linoleic acid using Ru-MgAl450 catalyst.

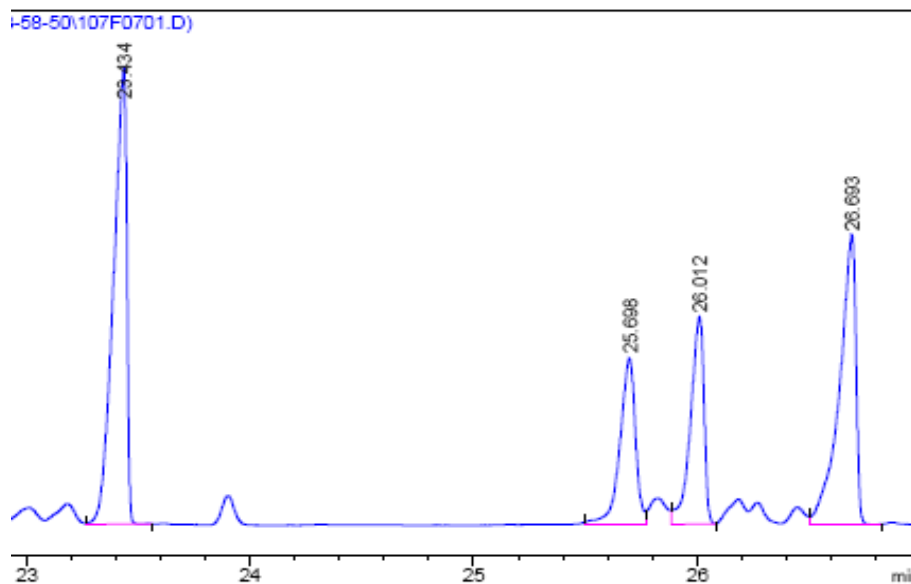

Fig.S9. Gas chromatogram of the isomerization products from linoleic acid using Ru-MgAl550 catalyst.

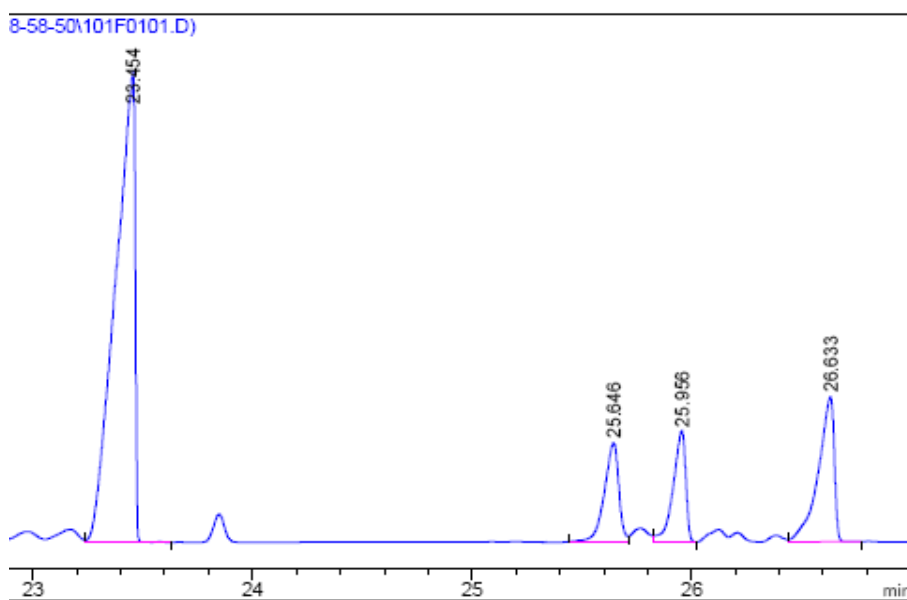

Fig.S10. Gas chromatogram of the isomerization products from linoleic acid using Ru-MgA650 catalyst.

I-12-06\藿香正气水0000007.D)

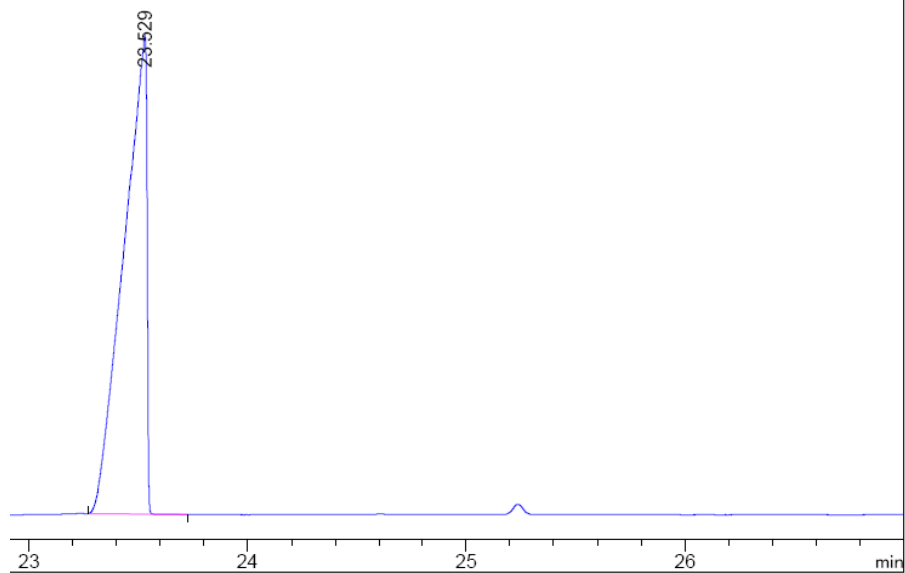

Fig.S11. Gas chromatogram of the isomerization products from linoleic acid using Ru-MgAl700 catalyst.
